# Supplementary material for: Visualization of early events in mRNA vaccine delivery in non-human primates via PET–CT and near-infrared imaging
Source: Springer Nature journal article supplement (doi:10.1038/s41551-019-0378-3), 2019-04-01
Supplement: 41551_2019_378_MOESM1_ESM.pdf [file 41551_2019_378_MOESM1_ESM.pdf]

In the format provided by the authors and unedited.

# Visualization of early events in mRNA vaccine delivery in non-human primates via PET-CT and near-infrared imaging

Kevin E. Lindsay<sup>1,5</sup>, Sushma M. Bhosle<sup>1,5</sup>, Chiara Zurla<sup>1,5</sup>, Jared Beyersdorf<sup>1</sup>, Kenneth A. Rogers<sup>2</sup>, Daryll Vanover<sup>1</sup>, Peng Xiao<sup>2</sup>, Mariluz Araínga<sup>2</sup>, Lisa M. Shirreff<sup>2</sup>, Bruno Pitard<sup>3</sup>, Patrick Baumhof<sup>4</sup>, Francois Villinger<sup>2</sup> and Philip J. Santangelo<sup>1\*</sup>

<sup>1</sup>Wallace H. Coulter Department of Biomedical Engineering, Georgia Tech and Emory University, Atlanta, GA, USA. <sup>2</sup>New Iberia Research Center, University of Louisiana at Lafayette, Lafayette, LA, USA. <sup>3</sup>CRCINA, INSERM, University of Nantes, University of Angers, Nantes, France. <sup>4</sup>CureVac AG, Tübingen, Germany. <sup>5</sup>These authors contributed equally: Kevin E. Lindsay, Sushma M. Bhosle, Chiara Zurla. \*e-mail: [philip.santangelo@bme.gatech.edu](mailto:philip.santangelo@bme.gatech.edu)

## Table of contents

- **Supplementary Fig 1:** Excised inguinal lymph node from animal AFO32
- **Supplementary Figs. 2–5:** Gating strategies for flow cytometry data analysis
- **Supplementary Figs. 6–11:** Immunofluorescence staining in cells and tissues
- **Supplementary Table 1:** Stability of the dual labeling PET/CT platform
- **Supplementary Tables 2–3:** Details of flow cytometry panels
- **Supplementary Table 4:** List of antibodies for immunofluorescence staining

**Supplementary Video:** 3-D reconstruction of vaccine PET-CT signal at 28 hours post injection in AF093

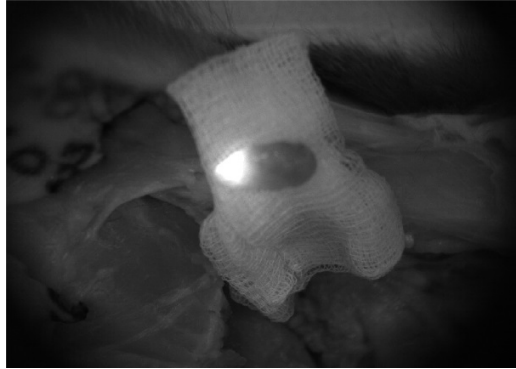

**Suppl. Fig 1: Excised inguinal lymph node from animal AFO32.** Analysis of the isolated organ using the portable near IR camera showed that only a well demarcated portion of its volume was positive for mRNA signal

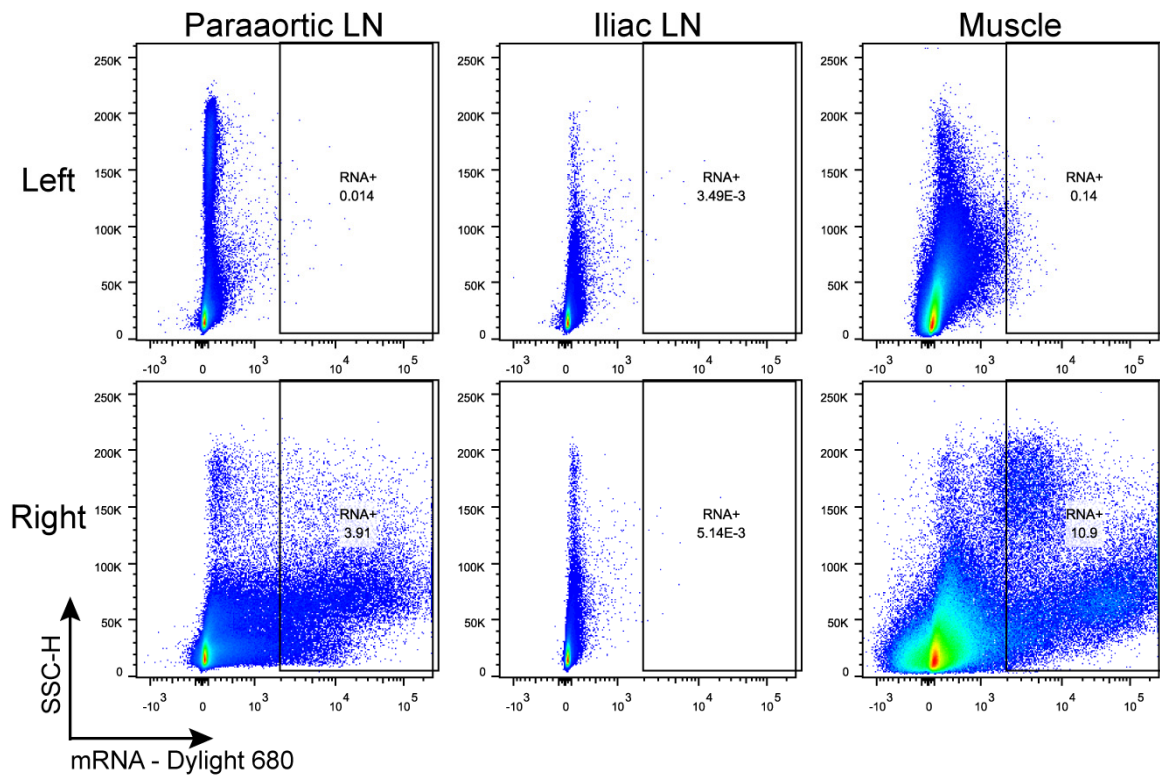

**Suppl. Fig.2: Total mRNA+ Cells in the muscles and draining LNs of CM-653.** After gating for cells and removing doublets, the plots show the total number of mRNA+ cells identified in each tissue by flow cytometry. Right: ipsilateral, left:contralateral. n=1

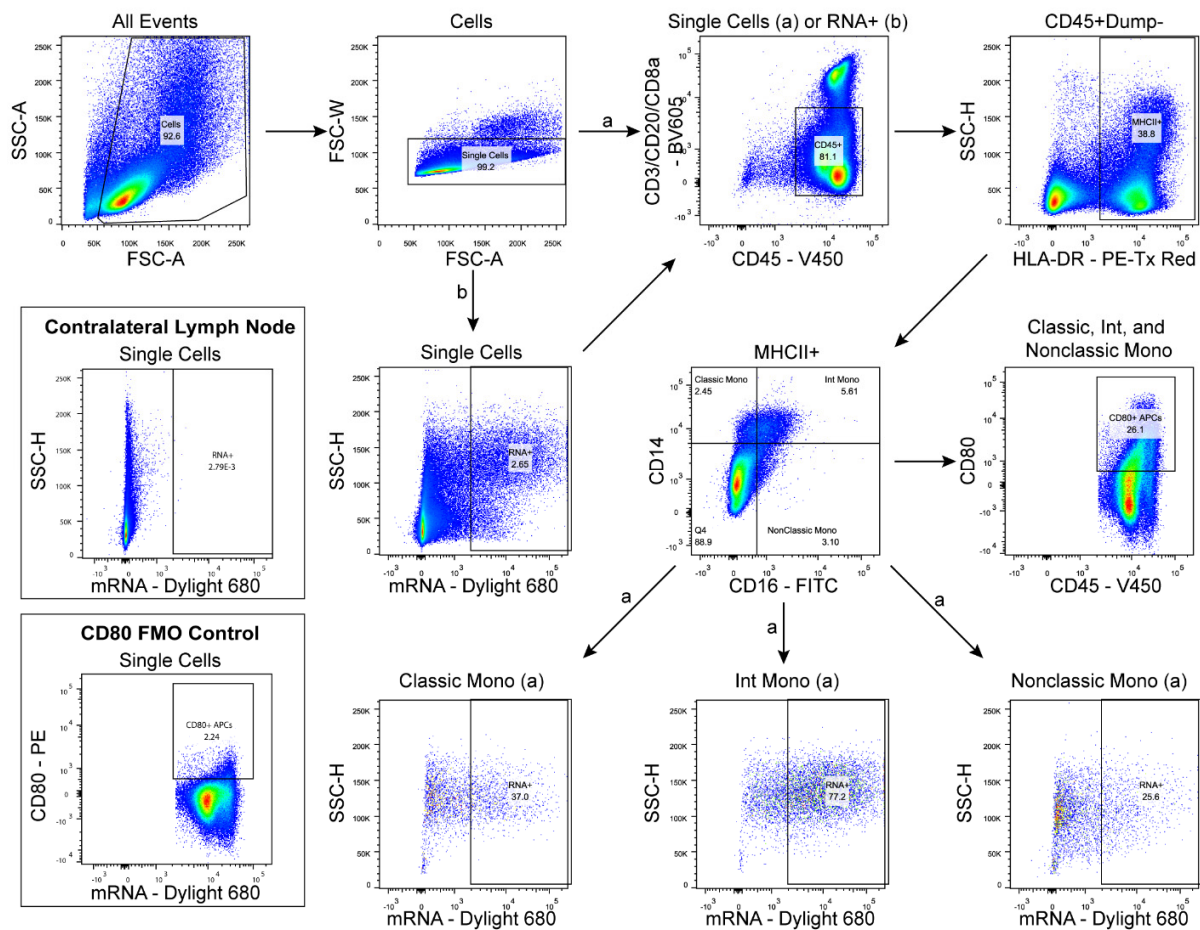

**Suppl Fig. 3 Gating Strategy for Monocyte Subtypes.** Cell suspensions obtained from processed muscle or lymph nodes were stained with indicated antibodies (Suppl.Tables 2-3). The data from each tissue were analyzed using two gating paths: cell type followed by mRNA uptake (path a) or mRNA uptake followed by cell type (path b). Arrows used in paths a or b are labeled. Unlabeled arrows are used in both gating paths. The gating scheme was adapted from Kasturi et al.<sup>1</sup> Classical monocytes, intermediate monocytes, and nonclassical monocytes were identified as CD14+CD16-, CD14+CD16+, and CD14-CD16+, respectively. Data shown are from analysis of the ipsilateral (right) paraaortic lymph node. Boxed plots depict data from contralateral paraaortic lymph node to show gating limits for RNA+ cells and a CD80 FMO control sample to show gating limits for CD80+ cells.

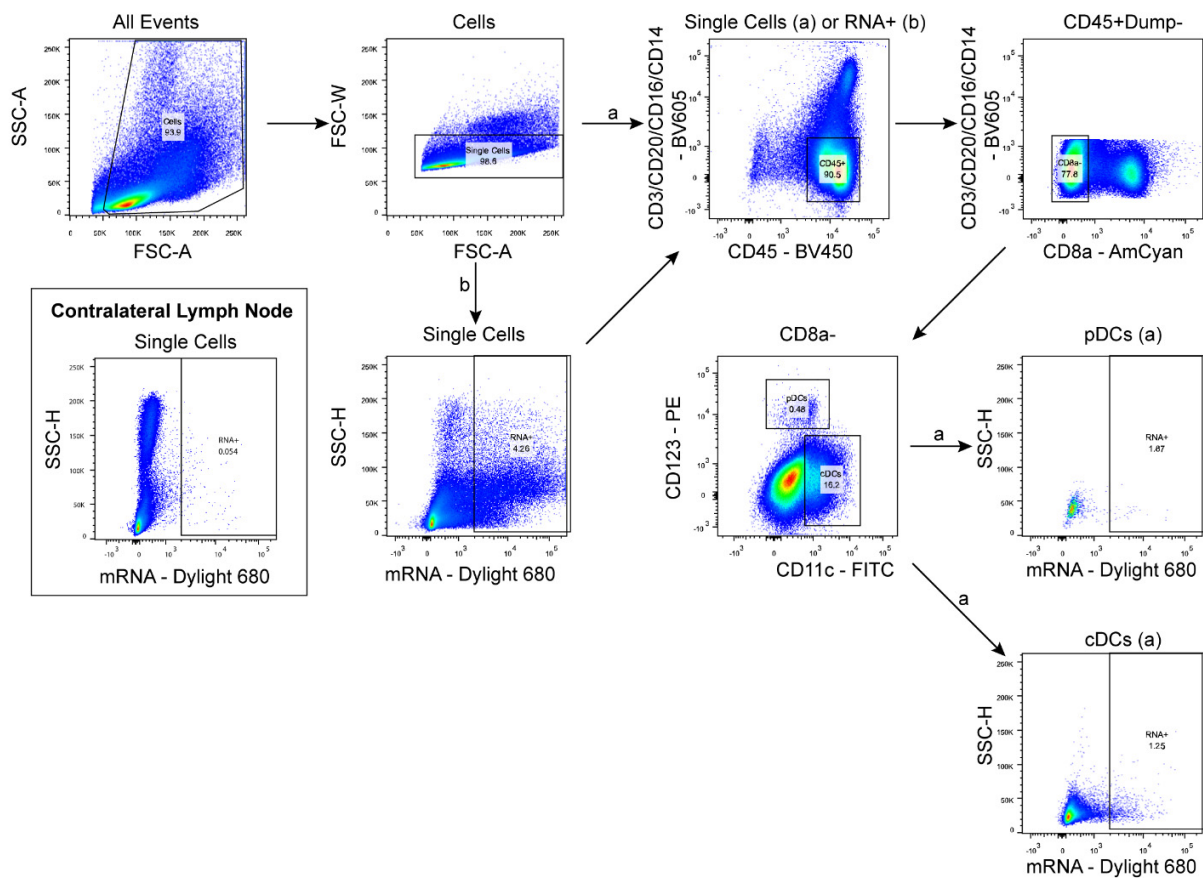

**Suppl. Fig. 4 Gating Strategy for Conventional and Plasmacytoid Dendritic Cells.**

Cell suspensions obtained from processed muscle or lymph nodes were stained with antibodies indicated in Suppl. Tables 2-3. The data from each tissue were analyzed by two gating paths: cell type followed by mRNA uptake (path a) or mRNA uptake followed by cell type (path b). Arrows used in path a or b are labeled. Unlabeled arrows are used in both gating paths. Gating scheme was adapted from Kasturi et al<sup>1</sup> Data shown are from analysis of the ipsilateral (right) paraaortic lymph node. Boxed plot depicts data from contralateral paraaortic lymph node to show gating limits for RNA+ cells.

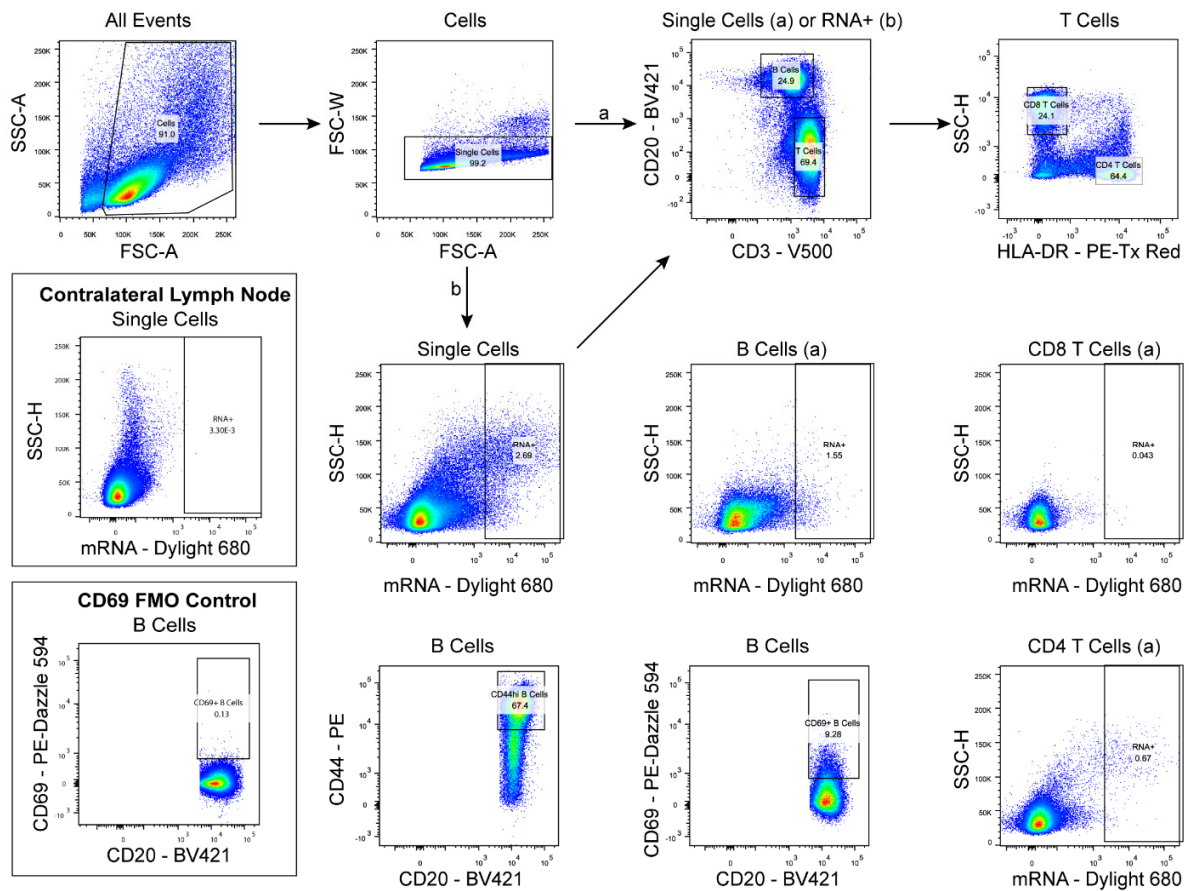

**Suppl. Fig. 5 Gating Strategy for T and B Cells.** Cell suspensions obtained from processed muscle or lymph nodes were stained with antibodies indicated in Suppl Tables 2-3. The data from each tissue were analyzed by two gating paths: cell type followed by mRNA uptake (path a) or mRNA uptake followed by cell type (path b). Arrows used in path a or b are labeled. Unlabeled arrows are used in both gating paths. Gating for CD44<sup>hi</sup> and CD69<sup>+</sup> cells was performed for B cells, CD4 T Cells, and CD8 T Cells. Data shown are from analysis of the ipsilateral (right) paraaortic lymph node. Boxed plots depict data from contralateral paraaortic lymph node to show gating limits for RNA<sup>+</sup> cells and a CD69 FMO control sample to show gating limits for CD69<sup>+</sup> cells.

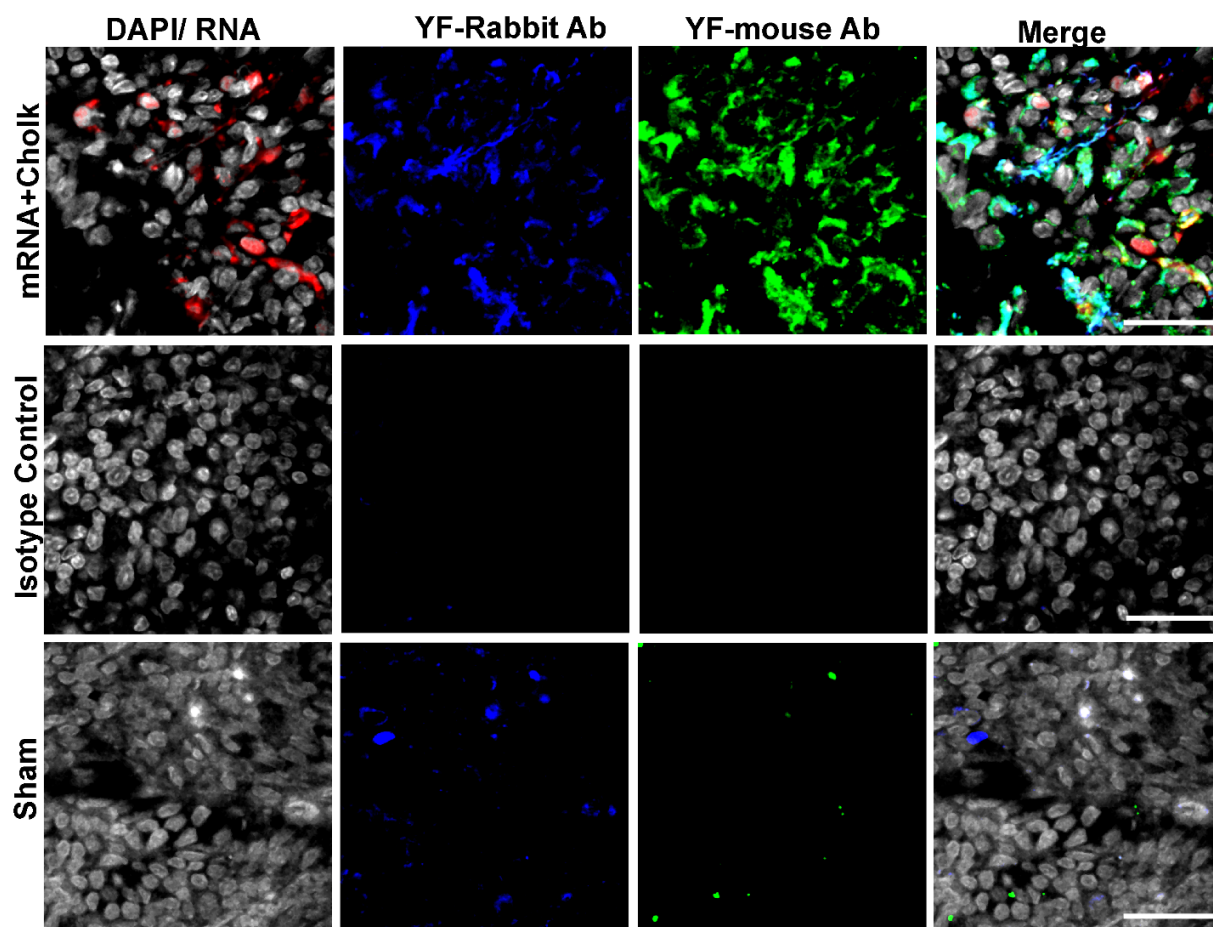

**Suppl. Fig 6 Detection of Yellow fever prME protein expression with two different antibodies in a macaque iliac lymph node:** Lymph node tissue sections were stained with a YF antibody raised in mouse (blue) and rabbit (green). mRNA is shown in red and DAPI in white. Images were acquired on a Zeiss 780 confocal microscope with a 40X objective. Scale bars are 30  $\mu$ m. Representative images are shown (n=3).



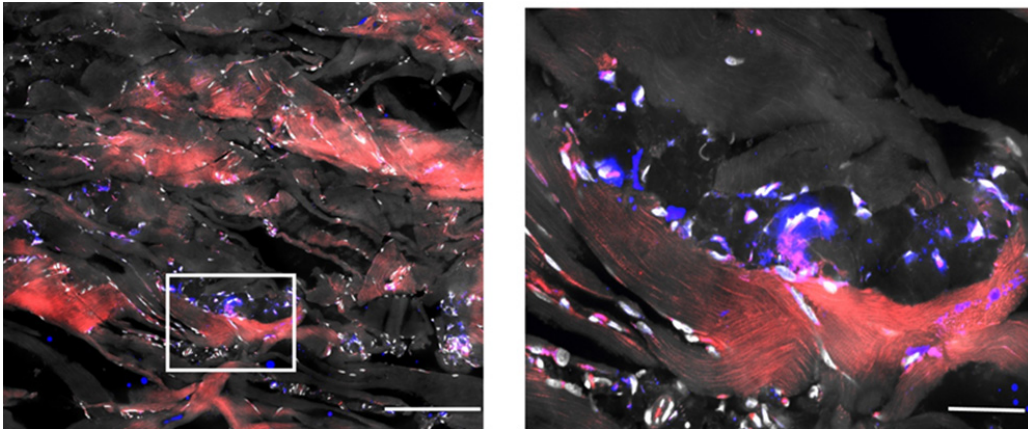

**Suppl. Fig 7: Yellow fever prME mRNA and protein expression in muscle.** Ipsilateral muscle stitched image was acquired on a Zeiss 780 confocal microscope with a 40X objective demonstrating mRNA and protein distribution in blue and red, respectively; the DAPI signal was purposely contrast enhanced to visualize muscle fibers. Scale bar is 200  $\mu\text{m}$ . Magnification of boxed area. Scale bar is 50  $\mu\text{m}$ . Representative images are shown (n=3).

**A Iliac LN - sham**

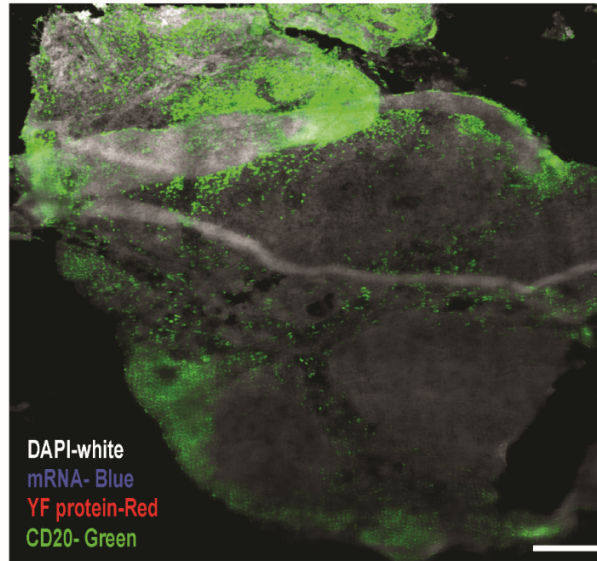

**B Muscle - sham**

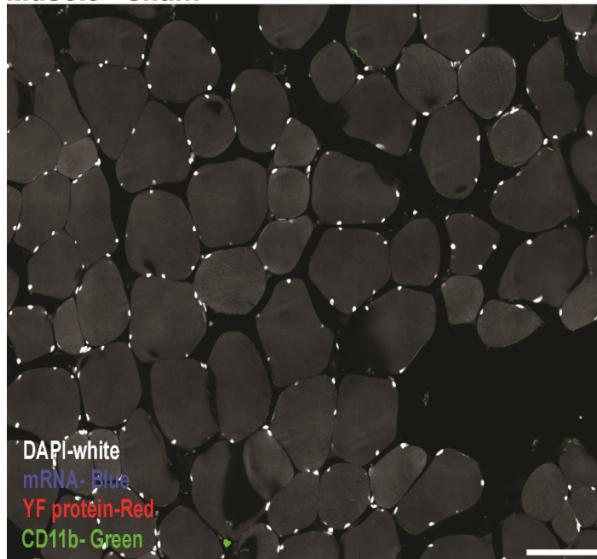

**Suppl. Fig 8: Stitched images for iliac LN and muscle from uninjected controls.** (A) Stitched image of sham Iliac LN stained for the YF protein (red) and the cell type marker CD20 (green). Images were acquired on a Zeiss 780 confocal microscope with a 20X objective. Scale bar is 200  $\mu$ m. (B) Stitched image of sham muscle stained for YF protein (red) and the cell type marker CD11b (green). Images were acquired on an Elyra confocal microscope with a 40X objective. Scale bar is 100  $\mu$ m. mRNA is shown in blue and DAPI in white. Representative images are shown (n=3).

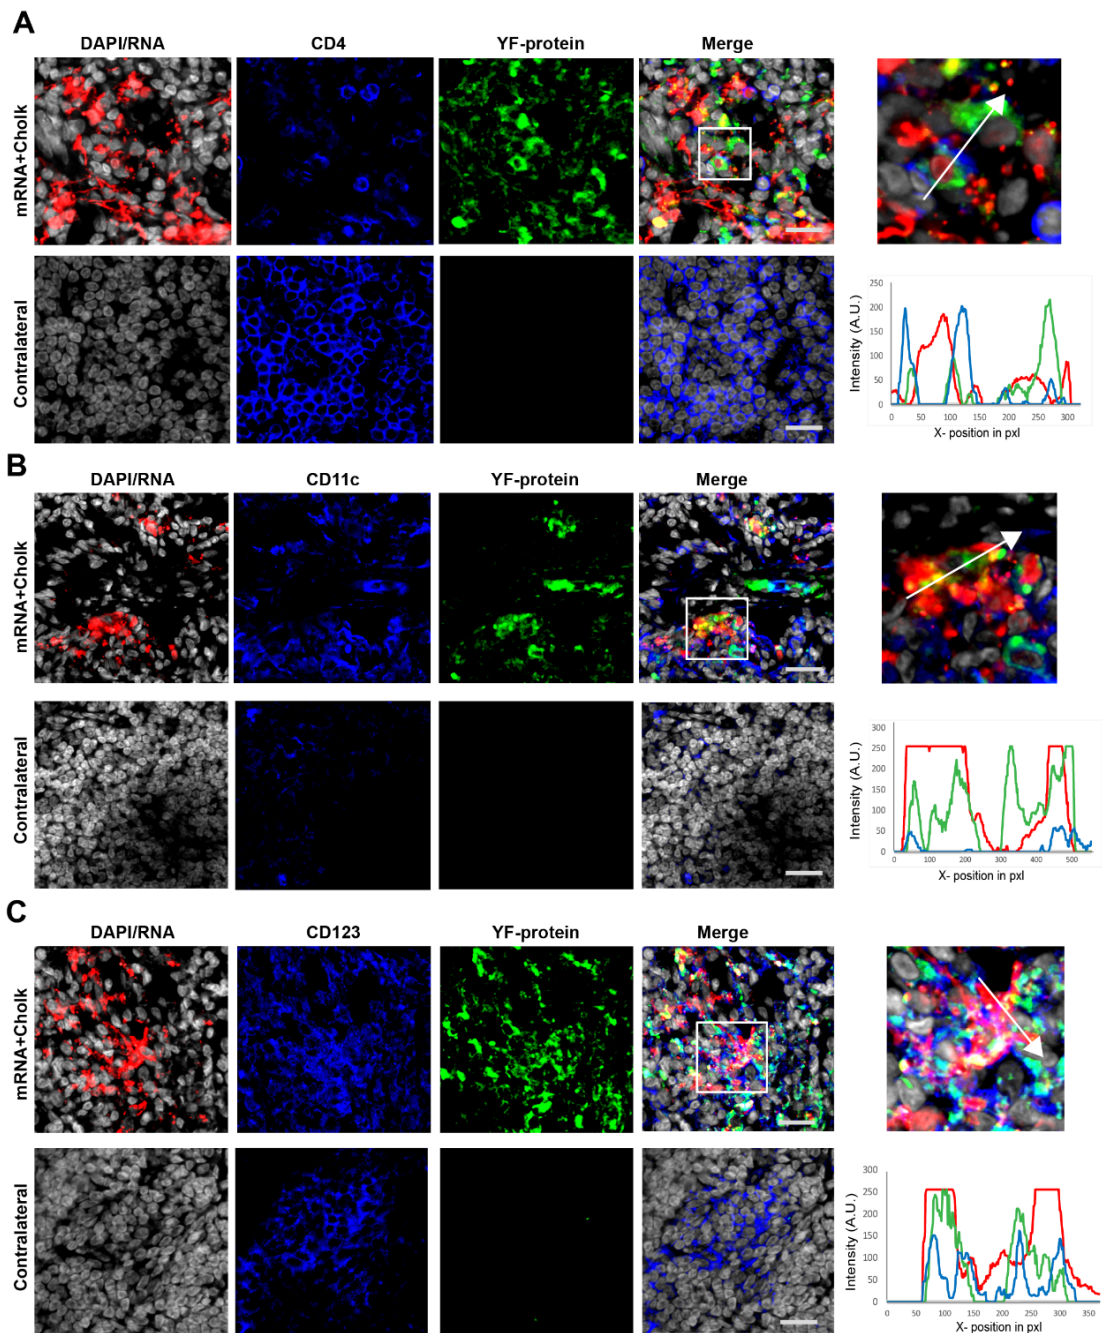

**Suppl. Fig 9: Yellow fever prME mRNA and protein expression in lymph node immune cells.** Lymph node tissue sections were stained with the immune cell markers (blue) CD4 (A), CD11c (B) and CD123 (C), YF prME protein (green) and counterstained for DAPI (white). Controls from uninjected monkeys are shown. Images were acquired on a Zeiss 780 confocal microscope with a 40X objective. Scale bars are 50  $\mu$ m. Line

profiles for cropped images indicate mRNA in red, cell marker in blue and protein in green. Representative images are shown (n=3).

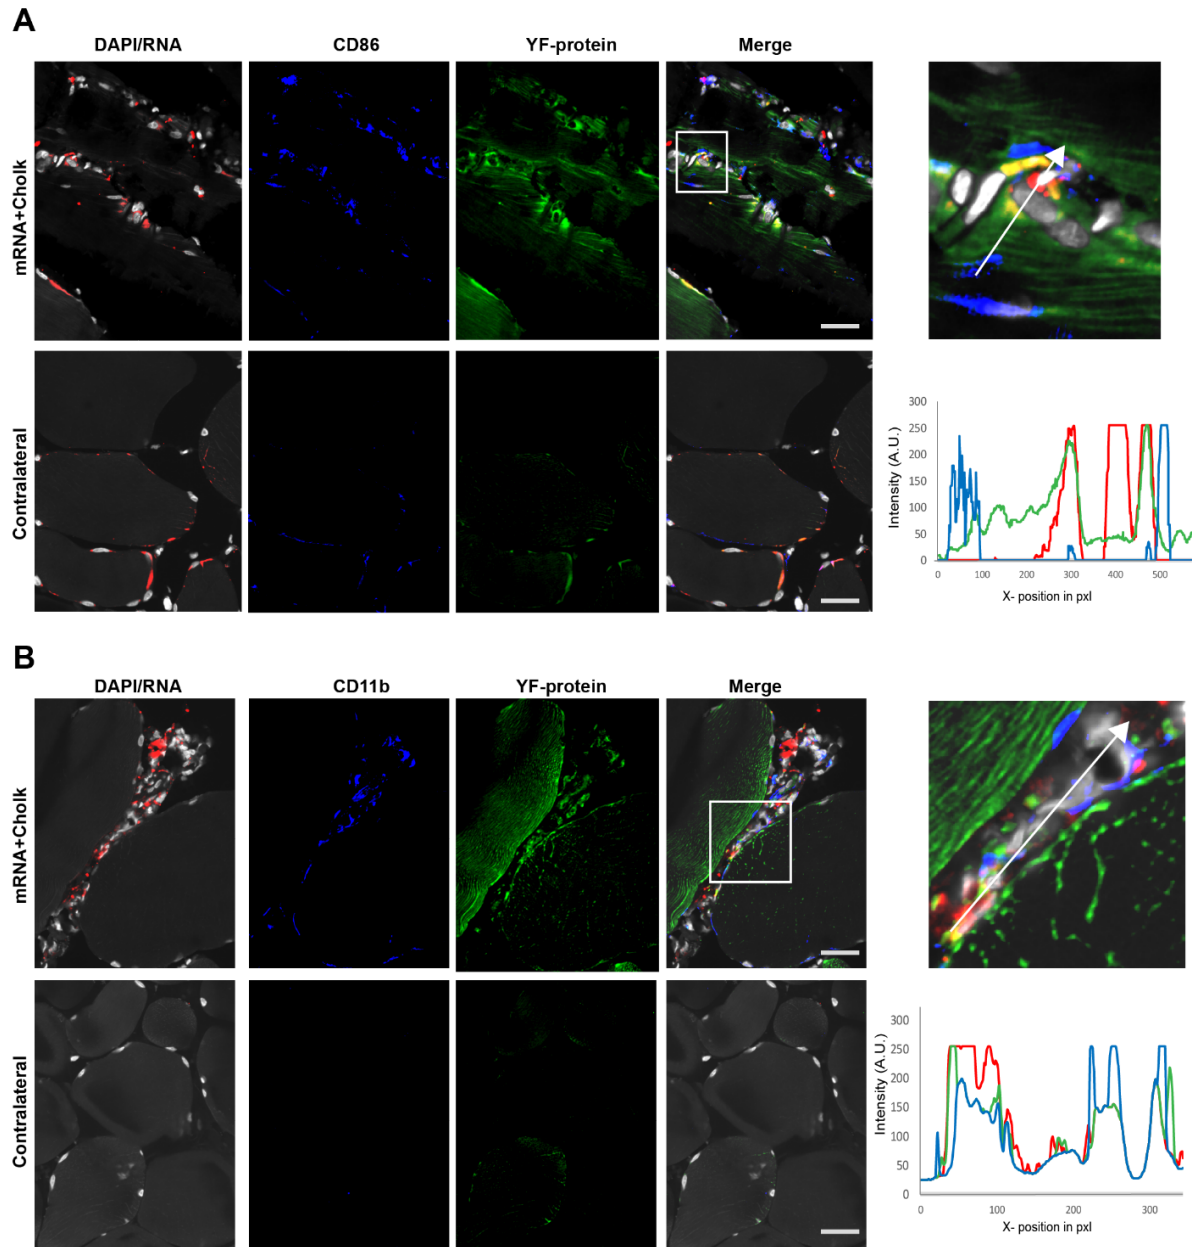

**Suppl. Fig 10: Infiltrating immune cells (APCs, Macrophages) and YF prME protein at site of injection.** Injected and contralateral muscles stained for YF protein in green, immune cell markers in blue [CD86 (A) and CD11b (B)]. mRNA is shown in red and DAPI in white. Images were acquired on a Zeiss 780 confocal microscope with 40X objective. Scale bars are 50  $\mu$ m. Line profiles for cropped images indicate mRNA in red, cell marker in blue and protein in green. Representative images are shown (n=3).

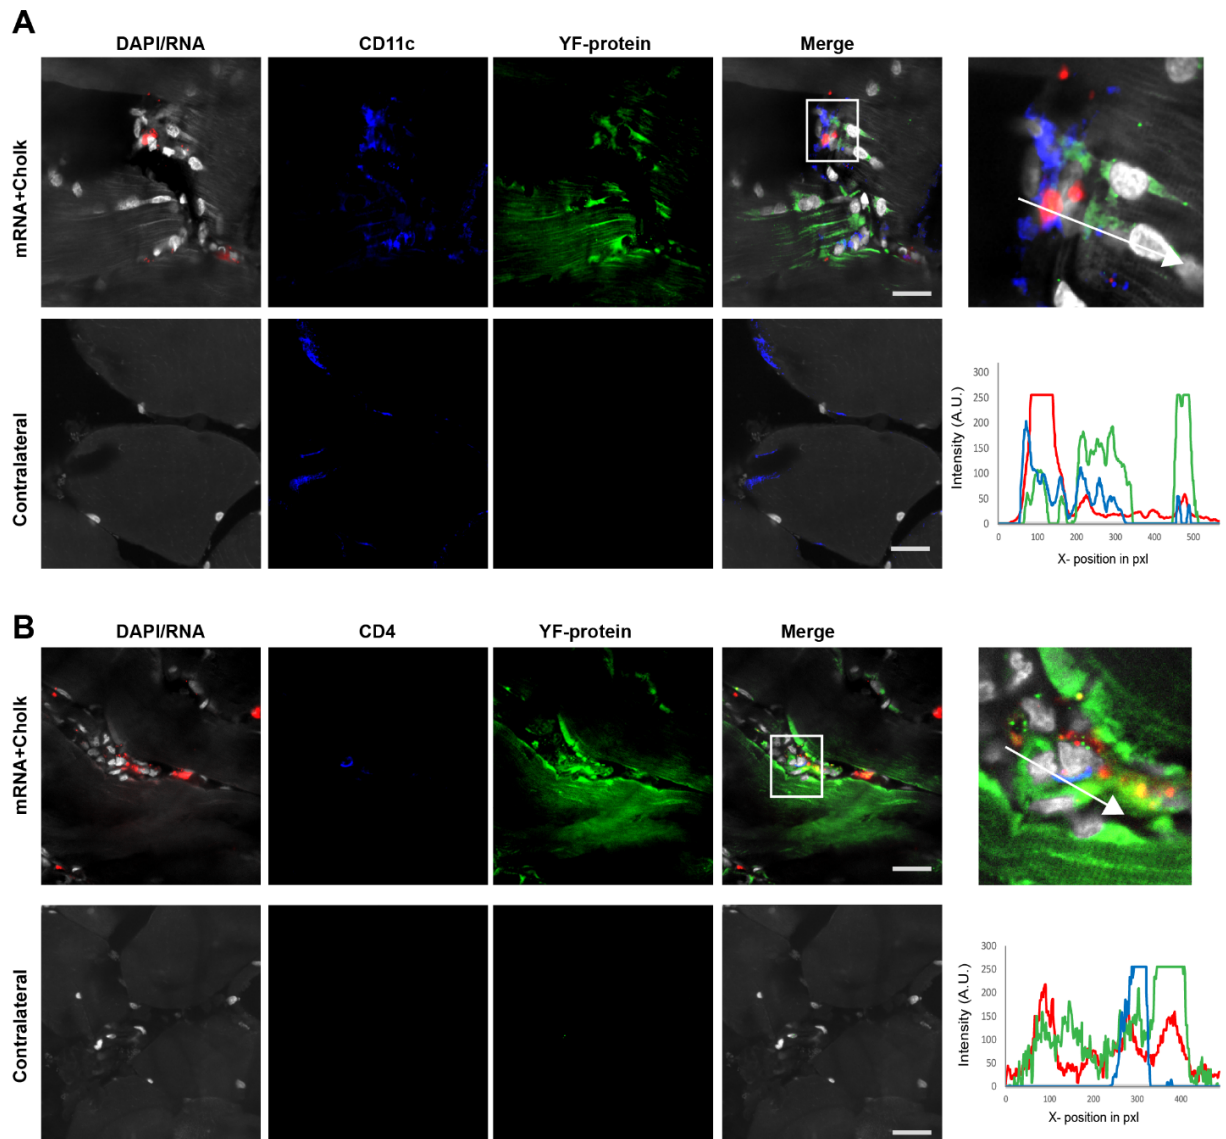

**Suppl. Fig 11: Infiltrating immune cells (DCs, T cells) and YF prME protein in muscle tissue.** Injected and contralateral muscle tissues stained for YF protein in green and immune cell markers in blue [CD11c (A) and CD4 (B)], mRNA is shown in red and DAPI in white. Images were acquired on an Zeiss 780 confocal microscope with 40X objective. Scale bars are 50  $\mu$ m. Line profiles for cropped images indicate mRNA in red, cell marker in blue and protein in green. Representative images are shown (n=3).

## Tables:

**Table 1:** Total SUV values, radioactivity, fluorescence, percentage of RNA positive cells and of activated intermediate monocytes in animal CM-653 24 hours post injection. The values in parenthesis refer to results obtained by the analysis of contralateral organs.

|               | Total SUV | Geiger counts ( $\mu$ Ci) | Fluobeam (+/-) | % RNA+ cells | % activated monocytes |
|---------------|-----------|---------------------------|----------------|--------------|-----------------------|
| Muscle        | 9412      | 248 (0)                   | +              | 10.9 (0.14)  | 24.5 (21.7)           |
| Inguinal LN   | 100       | 0 (0)                     | -              | N/A          | N/A                   |
| Iliac LN      | 12        | 0 (0)                     | -              | 0.01 (0.00)  | 45.7 (29.4)           |
| Paraaortic LN | 988       | 28 (0)                    | +              | 3.91 (0.01)  | 63 (59)               |

**Table 2:** Details of flow cytometry panels used to characterize RNA positive cell types in the muscle and draining LN of animal CM-653

| Channel | T and B           | DCs                         | Monocytes                |
|---------|-------------------|-----------------------------|--------------------------|
| 1       | CD4 BV605         | CD3, CD20, CD16, CD14 BV605 | CD3 CD20, and CD8a BV605 |
| 2       | CD3 V500          | CD8a Amcyan                 | CD14 V500                |
| 3       | CD20 BV421        | CD45 v450                   | CD45 V450                |
| 4       | CD69 PE-Dazzle594 | HLA-DR PE-Tx red            | HLA-DR PE-Tx red         |
| 5       | CD44PE            | CD123 PE                    | CD80 PE                  |
| 6       | CD8 FITC          | CD11c FITC                  | CD16FITC                 |
| 7       | mRNA Dylight 680  | mRNA Dylight 680            | mRNA Dylight 680         |

**Table 3:** List of antibodies used for flow cytometry

|              | List of antibodies | Clone     | Maunfacture       | Cat#    |
|--------------|--------------------|-----------|-------------------|---------|
| BV605        | CD4                | OKT4      | BioLegend         | 317438  |
|              | CD3                | SP34-2    | BD                | 562994  |
|              | CD20               | 2H7       | BD                | 563783  |
|              | CD16               | 3G8       | BioLegend         | 302040  |
|              | CD14               | M5E2      | BioLegend         | 301834  |
|              | CD8a               | SK1       | BD                | 564116  |
| V500         | CD3                | SP34-2    | BD                | 560770  |
|              | CD14               | M5E2      | BD                | 561391  |
| AmCyan       | CD8a               | SK1       | BD                | 339188  |
| BV421        | CD20               | 2H7       | BD                | 562873  |
| V450         | CD45               | D058-1283 | BD                | 561294  |
| PE-Dazzle594 | CD69               | FN50      | BioLegend         | 310942  |
| PE-Tx-Red    | HLA-DR             | TU36      | Life technologies | MHLDR17 |
| PE           | CD44               | IM7       | BioLegend         | 103024  |
|              | CD123              | 7G3       | BD                | 554529  |
|              | CD80               | L307.4    | BD                | 557227  |
| FITC         | CD8a               | RPA-T8    | BD                | 555366  |
|              | CD11c              | 3.9       | BioLegend         | 301604  |
|              | CD16               | 3G8       | BioLegend         | 302006  |

**Table 4:** List of antibodies used for immunofluorescence.

| Cell Marker                     | Primary antibody Host (source) / Dilution in blocking soln. | Secondary antibody (source) / Dil. In blocking soln. | Primary Antibody cat. No. / clone |
|---------------------------------|-------------------------------------------------------------|------------------------------------------------------|-----------------------------------|
| CD86 – Antigen presenting cells | Rabbit (Abcam) / 1:50                                       | Donkey anti rabbit-488 (Invitrogen) /1: 500          | ab53004 / EP1158Y                 |
| CD20- B cells                   | Rabbit(Abcam) / 1:50                                        | Donkey anti rabbit-488(Invitrogen) /1: 500           | ab78234 / EP459Y                  |
| CD68- Macrophages               | Rabbit (Santacruz)/ 1:25                                    | Donkey anti rabbit-488(Invitrogen) /1: 500           | sc-9139 / H-255                   |
| YF protein                      | Mouse (Sigma)/ 1:2000                                       | Donkey anti mouse 555 (Invitrogen) /1:500            | MAB984 / 2D12.A                   |
| CD123 – Plasmacytoid DCs        | Rabbit (Santacruz) (1:50)                                   | Donkey anti rabbit-488(Invitrogen) /1: 500           | Sc-681 / V-18                     |
| Cd11c – Myeloid DCs             | Rabbit (LS Bio) (1:25)                                      | Donkey antirabbit-488 (Invitrogen) /1: 500           | LS C165321 / Polyclonal           |
| CD4 – T Cells                   | Rabbit (abcam) (1:100)                                      | Donkey antirabbit-488 (Invitrogen) /1: 500           | ab133616/ EPR6855                 |

#### References:

1. Kasturi, S. P. *et al.* Adjuvanting a Simian Immunodeficiency Virus Vaccine with Toll-Like Receptor Ligands Encapsulated in Nanoparticles Induces Persistent Antibody Responses and Enhanced Protection in TRIM5 $\alpha$  Restrictive Macaques. *J. Virol.* **91**, (2017).
